# Supplementary material for: Hopfions emerge in ferroelectrics
Source: PubMed Central journal article supplement (PMC7229001; doi:10.1038/s41467-020-16258-w), 2020-05-15
Supplement: 41467_2020_16258_MOESM3_ESM.pdf [file 41467_2020_16258_MOESM3_ESM.pdf]

## Description of Additional Supplementary Files

Supplementary Movie 1:

**Hopfion-assisted switching.** The video illustrates the evolution of the polarization configuration upon the system passing the polarization switching displayed on the hysteresis loop for the strongly densified nanoparticles with  $h=1$  nm shown in Fig. 4e of the main text and going through the sequence of topological phase transitions.
